# Supplementary material
Source: HighWire-hosted journal article supplement (http://molpharm.aspetjournals.org/highwire/filestream/84363/field_highwire_adjunct_files/2/117804_Table_S2.xlsx)
Supplement: 117804_Table_S2.xlsx [file 117804_Table_S2.xlsx]

## Sheet: Sheet1
TABLE S2
								Two-tailed Student's t-test P values
GeneSymbol	Cal27	HN12	JHU011	UMSCC8	UMSCC25	Mean Rank		vs Ldha	vs Rpl11	vs Aldoa	vs Pgk1	vs Nono	vs Cpne1	vs Arhgdia	vs Hnrnpd	vs Actb	vs Gapdh
PRKAA1	23			26	74	41		0.0257671	0.0269191	0.00972702	0.00590052	0.000560872	0.00517227	0.000586722	0.0202046	0.000379363	0.000189346
RPS6KA4	3	146	58	17	15	47.8		0.0164563	0.00909677	0.00289407	0.00157648	0.000195021	0.00112245	0.000149764	0.00491108	6.17927e-05	3.95525e-05
EPHA4	21		54	20	111	51.5		0.0211358	0.0161178	0.00522994	0.00294078	0.000275798	0.00233399	0.000251177	0.0102197	0.000130419	6.55953e-05
MAP3K2	68	53	102	74	12	61.8		0.0137955	0.0090926	0.00239848	0.00120207	6.98993e-05	0.000900223	6.29405e-05	0.00505212	2.89493e-05	9.98186e-06
MAPK1	184	5	32	104	1	65.2		0.0513373	0.0194549	0.00762036	0.00438624	0.000932075	0.00281178	0.000624898	0.00879586	0.000221827	0.000176331
CDKL4	1	104	42	79	123	69.8		0.0286283	0.0137232	0.00419478	0.00219163	0.000214635	0.00151482	0.000165881	0.00681591	6.58936e-05	3.20387e-05
MAP3K3		102	20	71	90	70.75		0.0368603	0.0235286	0.00768086	0.00422916	0.000359463	0.00323456	0.000324291	0.0137049	0.000161018	6.71592e-05
NUAK2	67	165	14		47	73.25		0.066736	0.0324942	0.0127068	0.00746169	0.00124433	0.00528974	0.00094763	0.0172768	0.000406645	0.000268564
PACSIN1	22	83	44	22	206	75.4		0.0698097	0.0244491	0.00969915	0.00554789	0.00118174	0.00347607	0.000776371	0.010555	0.000265591	0.000200745
RPS6KA5	118	27	147	72	17	76.2		0.0441014	0.0180209	0.00597099	0.00318611	0.000397119	0.00210758	0.000286677	0.00836744	0.000105944	5.82861e-05
CDKL5	20	263	72	6	24	77		0.129275	0.0411487	0.0205458	0.0128805	0.00470292	0.0077133	0.00292588	0.0163337	0.000968924	0.00092596
MAP3K6	237		36	21	18	78		0.148049	0.0578241	0.029599	0.019239	0.00672563	0.0126033	0.00453876	0.027264	0.00176029	0.00165918
PAK3	19	115	199	15	42	78		0.0784926	0.0266946	0.0107908	0.00619969	0.00137604	0.00384655	0.000894129	0.0113218	0.000301607	0.000229729
ACVR2A	132	21	141	63	62	83.8		0.0521379	0.0204226	0.00659694	0.00344958	0.000377312	0.00226499	0.000275188	0.00924622	0.000100875	4.85094e-05
FYN	59		69	202	25	88.75		0.131516	0.0520649	0.0229605	0.0138963	0.00316102	0.009245	0.00220894	0.0249515	0.000858027	0.000624523
CDK8	93	72		32	184	95.25		0.131659	0.0522614	0.0215172	0.0125669	0.00221991	0.00842906	0.00160115	0.0250586	0.000629496	0.000379887
PAK4	14	256	74	24	115	96.6		0.189418	0.0554994	0.0271756	0.0165946	0.00557261	0.00962984	0.00336348	0.0207863	0.00104105	0.000878159
CAMK4	28	407	7	28	14	96.8		0.379888	0.139957	0.0980404	0.0719422	0.047396	0.0440492	0.0307213	0.0542479	0.0114017	0.0119488
MYLK	183	17	137	43	108	97.6		0.121515	0.0368701	0.0143245	0.0079068	0.00144968	0.00476198	0.000928235	0.0146328	0.00029594	0.000181391
BLK	166	101	27			98		0.194194	0.093696	0.0444303	0.0282466	0.0059531	0.0205035	0.00463578	0.0520062	0.0021528	0.00139904
PDPK1	58	138				98		0.248061	0.156009	0.0821004	0.0561292	0.0115547	0.0451747	0.0103359	0.103295	0.00599388	0.00359873
CLK1	136	49	79	14	219	99.4		0.158888	0.0460989	0.0199617	0.0115105	0.00283586	0.0067496	0.0017408	0.0175896	0.00053628	0.000383631
AKT2	60	209	65	162	19	103		0.173831	0.0494034	0.021392	0.0122812	0.00298173	0.00714965	0.00181887	0.0185924	0.000552738	0.000384211
CDK9	37	269	3	111		105		0.308854	0.109451	0.062959	0.0422053	0.0182144	0.0263348	0.0117129	0.0468605	0.00422979	0.00385512
COL4A3BP	6	31	106	245	140	105.6		0.231614	0.0653716	0.0320837	0.0194342	0.00640076	0.0110932	0.00380131	0.023758	0.00113799	0.000908629
STK10	103	9	131	113	185	108.2		0.162952	0.0458071	0.0177946	0.009676	0.00166895	0.00569536	0.0010514	0.0173724	0.000322266	0.000177554
NTRK2	115	69	117	151	96	109.6		0.102625	0.0330271	0.00992645	0.00482979	0.000311281	0.00306522	0.000240778	0.0134723	8.66008e-05	2.27184e-05
CDKL3	63	93	185	41	173	111		0.181875	0.0498921	0.019738	0.0107739	0.00193266	0.00627618	0.00120186	0.0186036	0.000362093	0.000200546
EPHB2	124	46	160	168	61	111.8		0.164087	0.045657	0.0168301	0.00889621	0.00125867	0.00526233	0.000811973	0.0172931	0.000251103	0.000118433
ATM	54	372	87	60	2	115		0.436517	0.14632	0.0963907	0.0675604	0.039716	0.0394705	0.0244263	0.0531598	0.00809012	0.00776327
CDK2	13	156	226	7	174	115.2		0.309927	0.0859928	0.0446158	0.0274831	0.0100102	0.0153906	0.00582896	0.0301299	0.00169423	0.00134706
PRKCD	4			66	279	116.333		0.462537	0.199779	0.131107	0.0954451	0.0495996	0.0645346	0.0342202	0.0993437	0.0145076	0.0137089
CDK17	185	59	167	65	109	117		0.201461	0.0533542	0.0203159	0.0108014	0.00163783	0.00626174	0.00102947	0.0195695	0.000307563	0.000146154
STRADB		168	62	206	40	119		0.310851	0.101307	0.049422	0.0302074	0.00806202	0.0186696	0.00519723	0.0426729	0.00178281	0.0011918
RIPK2	155	134	111	112	85	119.4		0.149582	0.0424584	0.0130222	0.00626592	0.000384713	0.00385225	0.000292636	0.0163305	0.000100823	2.30792e-05
PRKX	257	8	130	48	154	119.4		0.336106	0.0918268	0.0474987	0.0290856	0.0103849	0.0161596	0.00599731	0.0317554	0.00171208	0.00131796
EEF2K	15	262	85	235	10	121.4		0.418144	0.124907	0.0741502	0.048741	0.0233727	0.0273801	0.0137064	0.0433422	0.00410023	0.00356232
ERBB3	24	35	492	12	59	124.4		0.618005	0.268186	0.20941	0.163736	0.124984	0.105309	0.0853356	0.11094	0.0349369	0.0347732
STRADA	78	137	28	166	214	124.6		0.307348	0.0777399	0.0344577	0.0194274	0.00451561	0.0107683	0.00262984	0.0267909	0.000729063	0.000430227
IRAK1	192	105	6	13	310	125.2		0.471449	0.146515	0.0912202	0.0614261	0.0321347	0.0347064	0.0190008	0.0509693	0.00578537	0.00511415
MAP3K9	441	22	142	16	9	126		0.594794	0.238342	0.178457	0.135217	0.0970142	0.083796	0.0637364	0.093298	0.0240591	0.0235117
STK3	462		41	1	5	127.25		0.662287	0.31864	0.255187	0.205328	0.16006	0.139944	0.114543	0.149274	0.0523512	0.0527859
DAPK3	11	215	56	227	141	130		0.426062	0.114038	0.0602234	0.0368405	0.0133263	0.020068	0.00753434	0.0381396	0.00206402	0.00150469
FLT3	309	97	188	31	28	130.6		0.496534	0.14836	0.0896044	0.0590224	0.0287732	0.0327833	0.0166683	0.050484	0.00485692	0.00406693
KSR1	167	148	221	5	112	130.6		0.38751	0.097944	0.0468807	0.0272264	0.00761266	0.0148	0.00431217	0.0327405	0.00115933	0.000731574
BRAF	199	169	64	174	55	132.2		0.363836	0.0881936	0.038558	0.0213446	0.00451949	0.0116474	0.0026042	0.0295507	0.00069928	0.000368037
MYO3A	39	388	88	50	99	132.8		0.575711	0.196066	0.132575	0.0934259	0.0563601	0.0538989	0.0341953	0.0696395	0.0109443	0.00989072
STK25	70	125	89	237	143	132.8		0.362752	0.0872449	0.0375359	0.0205939	0.00412268	0.0112448	0.00238608	0.0292202	0.000641	0.000323724
RET	371	70	84	102	50	135.4		0.57463	0.185515	0.120641	0.0827812	0.0463011	0.0467475	0.0273906	0.0641422	0.00832244	0.00722244
MAP3K11	30	266	77	83	228	136.8		0.518316	0.14414	0.081637	0.0515152	0.021483	0.0279125	0.0120771	0.0475652	0.00329437	0.00248086
STK38		100	61	228	159	137		0.462765	0.139214	0.0691907	0.0416904	0.010527	0.0248523	0.00656332	0.0551384	0.00209902	0.00119945
ADCK3	12	261	29	217	167	137.2		0.543321	0.157638	0.0934293	0.0605034	0.0279031	0.033063	0.0158542	0.0524647	0.0044309	0.00349776
PIM1		2	126	252	169	137.25		0.541162	0.176909	0.103352	0.0678611	0.0277402	0.0402963	0.0169097	0.0697431	0.00546151	0.00413533
PIM2	40	24	144	122	364	138.8		0.61298	0.202259	0.134062	0.0928884	0.05358	0.0526161	0.0318172	0.0701069	0.00972644	0.00842221
HUNK	154	30	150	171	196	140.2		0.446403	0.10444	0.0461392	0.025337	0.00519743	0.0135493	0.00293835	0.0338556	0.000758617	0.000366242
PRKRA	45	270	46	224	120	141		0.561998	0.156281	0.0892702	0.056354	0.0236414	0.030331	0.0131887	0.0510324	0.003541	0.00261016
HCK	94	244	2	120	246	141.2		0.568332	0.159495	0.0920094	0.0584073	0.0250556	0.0314858	0.0140046	0.0521616	0.00377713	0.00281315
ACVR2B	177	201	21	213	98	142		0.517256	0.129124	0.0648071	0.0379811	0.0113722	0.0201228	0.00625103	0.0414327	0.00159684	0.000967869
TRPM7	27	265	298	19	101	142		0.636203	0.206967	0.135982	0.0934626	0.0527377	0.0524639	0.030981	0.0708823	0.00925487	0.00782567
SIK2	317	54	164	40	147	144.4		0.619112	0.180998	0.109097	0.0708681	0.0332545	0.038381	0.0186988	0.0593803	0.00510936	0.00391125
FGFR4	189	92	184	114	145	144.8		0.447295	0.0972467	0.0375696	0.0190818	0.0022282	0.0102941	0.00134827	0.0313441	0.000358762	0.000108657
STK19	172	293	5	121		147.75		0.682689	0.23746	0.15239	0.104643	0.0522652	0.0620177	0.031786	0.0927049	0.0103028	0.00816472
PRKCI	197	191	50	225	76	147.8		0.586182	0.144919	0.0734188	0.0428851	0.0127247	0.0224267	0.00689265	0.0455956	0.00171024	0.000986778
TAOK2		33	152	259		148		0.689403	0.273666	0.175741	0.123362	0.0552094	0.0799454	0.0363035	0.127572	0.0137923	0.0104588
HIPK2		109	194	275	16	148.5		0.67743	0.228399	0.142284	0.0958755	0.0443936	0.056353	0.026725	0.0883323	0.00846634	0.00642269
CSNK2A1	65	142	217	288	31	148.6		0.657317	0.188668	0.112373	0.0721472	0.0325288	0.0386241	0.0180346	0.0609603	0.00478229	0.00349997
SGK3	82	367	8	3	285	149		0.7566	0.298116	0.221839	0.165627	0.115859	0.099547	0.0735575	0.111653	0.0255635	0.0230011
MAPK12	206	60	168	180	133	149.4		0.551556	0.123004	0.0536917	0.0288027	0.00515243	0.0150682	0.00287623	0.0384339	0.000711893	0.000286453
PKN2	16	25	145	80	482	149.6		0.788575	0.345786	0.271761	0.211745	0.161366	0.133933	0.108145	0.139569	0.0420367	0.0390233
GSK3A	144	144	219	198	48	150.6		0.593898	0.137973	0.0648916	0.0361863	0.00832241	0.0187817	0.00452002	0.0428458	0.00109901	0.000523527
STK4	456	34	153	67	45	151		0.784704	0.324235	0.247459	0.188221	0.136965	0.115422	0.0888454	0.124992	0.0322291	0.0292618
CDC7	77	123	207	284	67	151.6		0.667025	0.178312	0.099628	0.0612931	0.0233293	0.0321299	0.0126146	0.0561567	0.00316644	0.00206668
TTBK1	80	192	120	100	269	152.2		0.644068	0.158838	0.0813391	0.0474818	0.0141153	0.0245868	0.00755746	0.0492615	0.00183371	0.00102293
DDR2	7	171	237	295	53	152.6		0.731004	0.23127	0.149617	0.100904	0.0540191	0.0552299	0.0307748	0.0766076	0.00860403	0.00673555
ALPK3	129	160	230	47	198	152.8		0.636235	0.150979	0.0738229	0.0419189	0.0107434	0.0216317	0.00576266	0.0465584	0.00138472	0.000696627
CSNK1G1	178	185	248	73	95	155.8		0.683604	0.163662	0.0817174	0.0467254	0.0124869	0.0239454	0.00663041	0.049995	0.00156915	0.000790882
WNK3	35	268	300		21	156		0.805703	0.320119	0.230132	0.169165	0.106761	0.103625	0.0676561	0.129592	0.0237786	0.0203283
TYRO3	51	272	302	119	37	156.2		0.775608	0.251823	0.166224	0.113282	0.0627357	0.0621945	0.0358653	0.0836808	0.0100732	0.00787485
EPHB1	182	150	223	70		156.25		0.698638	0.198682	0.10264	0.0613131	0.0149578	0.0350158	0.00891997	0.0737321	0.00261378	0.00124152
STK35		3	127	450	46	156.5		0.85167	0.407597	0.326973	0.260888	0.201157	0.17367	0.140202	0.184438	0.0598448	0.0557387
BMP2K	92	39	155	261	236	156.6		0.73636	0.201024	0.115381	0.0717024	0.028584	0.0373778	0.0153424	0.0627687	0.00379743	0.00246019
NEK3	71	107	192	274	144	157.6		0.725112	0.181863	0.0961128	0.0566806	0.0178247	0.0290505	0.00940967	0.0555947	0.00223003	0.00123441
CAMK1G	64		97	34	436	157.75		0.852308	0.390554	0.306343	0.239977	0.178078	0.156184	0.121077	0.17117	0.049035	0.044796
PDXK	323	202	66	118	80	157.8		0.771406	0.22787	0.14013	0.0909029	0.042809	0.0482448	0.0234746	0.0726552	0.00607189	0.0043037
MTOR	343	207	115	9	127	160.2		0.822074	0.271258	0.181237	0.124122	0.0698649	0.0680791	0.0398777	0.0900013	0.0111347	0.00859703
CDK5R1	105	279	25	216	176	160.2		0.792003	0.224987	0.134159	0.0850442	0.03679	0.0444361	0.0197881	0.070378	0.00491985	0.00326553
WNK2	76	242	285	45	155	160.6		0.803403	0.235223	0.143833	0.0926569	0.0426011	0.048781	0.0231237	0.0742408	0.00585458	0.00401948
MAP3K12	107	113	197	278	117	162.4		0.791494	0.195695	0.102745	0.0598696	0.0177737	0.030289	0.00924971	0.0587808	0.00212376	0.00108434
DDR1	191	36		91	332	162.5		0.857577	0.321694	0.222669	0.15861	0.0909651	0.0942916	0.0555203	0.125484	0.0180511	0.0142483
AXL	233	196	122	196	68	163		0.790642	0.187153	0.0939072	0.0531543	0.0134896	0.0267379	0.00702058	0.0557181	0.00159187	0.000722626
GSK3B	147	287	73	8	301	163.2		0.861342	0.295795	0.202996	0.141366	0.0835693	0.0783449	0.0482797	0.0994349	0.0137679	0.0107489
BRD3	42	95	186	130	365	163.6		0.861908	0.288366	0.194551	0.133763	0.0762467	0.073303	0.043455	0.0955695	0.0120671	0.00921256
CIT	210	76	118	77	339	164		0.856457	0.267686	0.172259	0.114468	0.0587065	0.0611154	0.0324064	0.0858992	0.00846073	0.00606407
BMPR1A	143	286	314	37	43	164.6		0.878567	0.306268	0.212206	0.148656	0.0893585	0.08269	0.0518416	0.103451	0.0148875	0.0116473
TLK1	362	329	53	49	35	165.6		0.908265	0.374375	0.28527	0.215123	0.154252	0.129267	0.0977219	0.140401	0.0334178	0.0286177
PRKDC	111	75	175	203	268	166.4		0.857244	0.217197	0.117439	0.0692349	0.0218328	0.0348075	0.0112459	0.0647308	0.00253998	0.00130413
ULK1	203	79	67	449	38	167.2		0.925353	0.391765	0.302517	0.230475	0.168771	0.140112	0.108255	0.149438	0.0379336	0.0326479
RPS6KB1		18	138	141	372	167.25		0.918537	0.376075	0.276718	0.205282	0.133395	0.125465	0.0842197	0.151715	0.0291858	0.0241078
VRK3	135	389	107	81	131	168.6		0.921531	0.316583	0.21731	0.150641	0.0880296	0.0826425	0.0501951	0.1051	0.0138937	0.010471
GRK5	137	285	313	51	63	169.8		0.934899	0.318981	0.217981	0.15043	0.086811	0.0820882	0.0491701	0.105198	0.0134221	0.0099732
PTK7	259	50	125	144	273	170.2		0.927902	0.268062	0.162705	0.103015	0.044501	0.0528936	0.0233823	0.0820344	0.00552955	0.00341018
STK32B	274	81	4	410	84	170.6		0.9564	0.405186	0.31288	0.237934	0.173692	0.14396	0.110782	0.153601	0.0382605	0.0324588
PRKCQ	311	19	139	33	351	170.6		0.953495	0.382485	0.287229	0.213373	0.148311	0.125435	0.0916292	0.139214	0.0296482	0.0244682
ADRBK1	314		51	150		171.667		0.962023	0.413637	0.298607	0.221229	0.12721	0.14225	0.0825591	0.18956	0.0307852	0.0237011
CSNK1A1L	110	251	101	143	254	171.8		0.94425	0.243891	0.134784	0.0798438	0.0257907	0.0397225	0.0130883	0.0717686	0.00287368	0.00142636
PKDCC	249	44	158	263	158	174.4		0.987944	0.280208	0.167687	0.104475	0.0423276	0.0527938	0.0217865	0.0841328	0.00493919	0.00281764
MAP2K3	96	381	43	222	132	174.8		0.995436	0.366026	0.261705	0.186222	0.116922	0.104004	0.0680244	0.124466	0.0194616	0.0148171
Ldha	121	135	214	287	119	175.2		1	0.260275	0.144991	0.0858178	0.0275855	0.0423623	0.0138516	0.0758906	0.00297747	0.00142344
PKN3	102	116	200	280	178	175.2		1	0.256772	0.141339	0.0829736	0.0256018	0.0408481	0.0128306	0.0745992	0.00274279	0.00127106
DSTYK	193	174	240	61	208	175.2		1	0.251542	0.13592	0.0787921	0.0227745	0.0386454	0.0113911	0.0727028	0.00241745	0.00106528
ROCK1	108	368	16	2	383	175.4		0.998281	0.467162	0.377043	0.297461	0.232626	0.188693	0.155917	0.190154	0.0595779	0.051687
PLK1	91	143	218	181	248	176.2		0.982022	0.24746	0.129601	0.0734003	0.0186478	0.0357094	0.00929286	0.0707169	0.00194097	0.000763241
CDK6	299	52	114	411	7	176.6		0.987052	0.448333	0.353287	0.272578	0.204818	0.167402	0.132631	0.173918	0.0470435	0.0396802
CDK14	131	284	312	123	39	177.8		0.967275	0.352816	0.24099	0.164908	0.0929467	0.0884333	0.0514336	0.113997	0.0133288	0.00929966
PRKCH	291	55	108	246	192	178.4		0.954592	0.320747	0.203607	0.131634	0.0615309	0.0675034	0.0321912	0.0981164	0.0075079	0.00458516
TYK2	36	45	159	264	388	178.4		0.966854	0.420022	0.317237	0.235579	0.1638	0.137503	0.100231	0.151653	0.0315794	0.0251904
MST1R	273	129	81	116	300	179.8		0.935803	0.33416	0.215562	0.140794	0.0682513	0.072545	0.0359021	0.102846	0.00844756	0.00523642
STK11	79	56	165	465	135	180		0.95412	0.457055	0.357795	0.273908	0.20285	0.166029	0.129422	0.174111	0.044364	0.0365976
DCLK1	258	443	12	64	130	181.4		0.942978	0.478617	0.380872	0.295733	0.224983	0.182626	0.146431	0.187408	0.0522792	0.0436507
CAMK1	84	37	154	260	391	185.2		0.892539	0.449989	0.3392	0.250181	0.171464	0.143904	0.103	0.1596	0.0310459	0.0237393
SIK3	66		468	152	56	185.5		0.914654	0.548463	0.452099	0.364786	0.288744	0.242552	0.200362	0.248577	0.0832269	0.071842
DYRK1B	157	173	239	176		186.25		0.793324	0.333809	0.181029	0.104785	0.0193606	0.0555196	0.0108615	0.112463	0.00272498	0.000694262
RAF1	10	260	296	315	51	186.4		0.88106	0.461535	0.35052	0.260014	0.180508	0.150445	0.10914	0.165078	0.0332855	0.0255321
CSNK2A2	49	210	262	199	212	186.4		0.824329	0.343799	0.209859	0.130019	0.051222	0.0639916	0.0253747	0.100337	0.00531152	0.00265103
MAPK13	171	84	91	154	432	186.4		0.879794	0.458078	0.346329	0.255872	0.176048	0.147309	0.105828	0.162734	0.0319008	0.0243128
MAP2K4	337	392	11	96	97	186.6		0.892516	0.501985	0.399262	0.308956	0.233693	0.189147	0.150531	0.194383	0.0523161	0.0426365
EPHA8	101	89	181	271	296	187.6		0.8232	0.378184	0.247009	0.161084	0.0775223	0.081837	0.0399189	0.114738	0.00895816	0.00518034
TTBK2	471	87	113	190	79	188		0.877564	0.505993	0.401305	0.309443	0.232548	0.18829	0.14875	0.194297	0.0508671	0.0410252
RYK	405	211		92	49	189.25		0.864419	0.524563	0.413935	0.320244	0.232303	0.200858	0.15071	0.21946	0.0542013	0.0434141
CDK16	403	6	129		221	189.75		0.864844	0.539072	0.431382	0.33789	0.251997	0.215166	0.166415	0.230186	0.0620449	0.0505876
TNIK	367	120	204	137	121	189.8		0.805372	0.412701	0.282452	0.190808	0.103305	0.0994519	0.0549115	0.129278	0.0130205	0.00810778
GAK	88	126	208	106	421	189.8		0.839151	0.471821	0.355165	0.260632	0.176618	0.14829	0.104609	0.165204	0.0304919	0.0225718
CDK12	329	13	134	136	338	190		0.839697	0.47858	0.363029	0.268219	0.184591	0.153864	0.110384	0.169431	0.0327892	0.0245324
CDK4		48	162	266	286	190.5		0.808791	0.45801	0.324457	0.228538	0.126365	0.130173	0.0725483	0.170057	0.0205626	0.01332
CAMKV	43	32	151	258	469	190.6		0.864294	0.548883	0.448886	0.356033	0.281406	0.225501	0.187844	0.223796	0.070227	0.0582224
MAST3	310	240	283	88	33	190.8		0.813998	0.453569	0.329996	0.234685	0.147259	0.128596	0.0833219	0.151283	0.0221837	0.0153887
TGFBR2	433	90	182	165	87	191.4		0.826278	0.491051	0.375062	0.278538	0.193908	0.160599	0.116597	0.175141	0.0349622	0.0261955
MAPK10		23	143	167	437	192.5		0.845147	0.56705	0.461135	0.366011	0.280783	0.236736	0.188685	0.247515	0.0727828	0.0599022
PDGFRA	352	145	220	56	190	192.6		0.774289	0.440111	0.30808	0.211377	0.119951	0.111317	0.0645225	0.139807	0.0155793	0.00985517
BTK	73	274	304	89	232	194.4		0.749205	0.450637	0.315719	0.216262	0.122059	0.1134	0.0652367	0.142534	0.0155271	0.00964261
FLT4	252	170	236	294	22	194.8		0.743603	0.453027	0.317463	0.217381	0.122546	0.113878	0.0654033	0.143155	0.0155169	0.00959624
CDKL1	245	130	211	285	105	195.2		0.684055	0.402232	0.251712	0.156374	0.061755	0.0756828	0.0297548	0.115668	0.00587469	0.00266484
PAK6	446	82	178	18	252	195.2		0.811985	0.557723	0.449851	0.351016	0.269781	0.216098	0.174502	0.218374	0.0606468	0.0482906
SRPK1	417	91	183	161	126	195.6		0.766126	0.498725	0.373351	0.271113	0.17921	0.151301	0.103501	0.170694	0.0284902	0.0199925
WNK4	332	124	82	147	293	195.6		0.739477	0.465888	0.331275	0.229548	0.134009	0.121551	0.0724842	0.149234	0.0176069	0.0111414
GRK1	410	78	176	25	291	196		0.795174	0.548587	0.436189	0.335388	0.250841	0.201899	0.158241	0.208067	0.0520947	0.040411
ADCK1	216	175	241	98	251	196.2		0.639423	0.387636	0.229402	0.135776	0.0424397	0.0637895	0.0197779	0.107619	0.00366566	0.00132451
MAPK3	302	40	60	179	400	196.2		0.791207	0.546946	0.433567	0.332333	0.247065	0.199123	0.155031	0.206094	0.0504571	0.0389084
MARK2	89	127	209	435	125	197		0.766015	0.528759	0.407947	0.304383	0.214107	0.175559	0.128556	0.189146	0.0381644	0.0279786
ACVR1C	406	132	212	52	183	197		0.75493	0.514538	0.389551	0.285476	0.192836	0.160863	0.112619	0.178462	0.031627	0.0224065
FASTK	253	149	222	59	302	197		0.695853	0.449942	0.305948	0.203356	0.10409	0.103247	0.0532635	0.137101	0.0116709	0.00652267
MKNK2	133	172	238		247	197.5		0.630639	0.436531	0.268709	0.166579	0.0489432	0.0870336	0.0254542	0.146693	0.00588973	0.00199315
TNK1	44	177	488	82		197.75		0.821055	0.633289	0.535906	0.441034	0.362149	0.29989	0.257006	0.297364	0.111102	0.094579
MAPKAPK2		189	251	300	52	198		0.715996	0.510479	0.369074	0.261947	0.148365	0.148575	0.0844144	0.189082	0.0233447	0.0145433
ADCK4	150	128	210	128	374	198		0.699539	0.473846	0.333378	0.228063	0.128054	0.118772	0.0677025	0.148944	0.0157122	0.00943291
DCLK3	90	178	243	420	60	198.2		0.758081	0.543273	0.423327	0.318578	0.228234	0.185658	0.138649	0.197186	0.0420872	0.0311356
PRKG2	442	108	193	30	225	199.6		0.759187	0.57223	0.457192	0.352316	0.264665	0.212093	0.166796	0.217374	0.0545595	0.0417675
MAP3K4	391	41	156	262	150	200		0.723757	0.538564	0.411653	0.303542	0.207955	0.1718	0.12195	0.188173	0.034384	0.0242127
TRIM28	363	152	80	234	171	200		0.679576	0.494341	0.353054	0.244154	0.141511	0.128165	0.0755055	0.157088	0.0177641	0.010785
EPHA6	487	28	148	256	82	200.2		0.782568	0.613792	0.510049	0.409119	0.329637	0.262109	0.222303	0.255451	0.0842154	0.0684588
CSK	130	96	187	272	316	200.2		0.649916	0.472489	0.32325	0.214881	0.109786	0.10849	0.0556412	0.143334	0.0119258	0.00645168
SCYL1	292	155	47		308	200.5		0.711877	0.552149	0.417659	0.307805	0.19665	0.180499	0.116851	0.212954	0.0349325	0.0237222
IKBKB	313	10	132	205	346	201.2		0.717965	0.555085	0.429714	0.320455	0.22514	0.183857	0.134132	0.197588	0.0389728	0.0278664
MAPK11	114	43	157	491		201.25		0.791764	0.652522	0.553334	0.455585	0.374535	0.309364	0.265259	0.306028	0.113829	0.0958623
CDK19	113	194	252	99	349	201.4		0.656626	0.500602	0.356063	0.244803	0.13935	0.127443	0.0734866	0.157637	0.0168834	0.00996495
SRC	29	249	23	214	492	201.4		0.783575	0.636344	0.536679	0.437061	0.360535	0.28704	0.249459	0.275256	0.10003	0.0827319
ETNK1	251	80	177	270	230	201.6		0.593187	0.456323	0.29563	0.186655	0.0782355	0.0900924	0.0373186	0.131487	0.0071809	0.00318023
STK32C	56	162	231	291	270	202		0.632165	0.491806	0.341775	0.229761	0.121759	0.116845	0.0622244	0.150672	0.0134952	0.0074168
SBK1	451	42	112	249	163	203.4		0.726479	0.60356	0.487729	0.379178	0.28963	0.230527	0.184357	0.232897	0.0613062	0.0467902
FGFR1	211	429	68	36	275	203.8		0.72601	0.609905	0.495061	0.386562	0.297632	0.236526	0.190788	0.237545	0.0643807	0.049415
MELK	338	182	245	68	187	204		0.615076	0.514712	0.364533	0.248611	0.137829	0.127798	0.0713504	0.15995	0.0157814	0.008875
TSSK1B	122	157	227	115	405	205.2		0.646904	0.560525	0.422831	0.306025	0.200401	0.168016	0.112921	0.188925	0.0292012	0.0190503
MAPK6		119	203	282	217	205.25		0.547587	0.51673	0.344741	0.224848	0.0871667	0.118298	0.0447272	0.176317	0.0101854	0.00406816
CDKL2	223	222	270	107		205.5		0.549644	0.521703	0.350839	0.23035	0.0924551	0.121621	0.0476049	0.178771	0.0109104	0.00450242
TRAD	207	237	280	62	242	205.6		0.56076	0.5052	0.343914	0.225303	0.108657	0.111117	0.0531192	0.14978	0.0105922	0.00511713
PSKH2	325	319	338	38	13	206.6		0.70872	0.638406	0.525212	0.415193	0.326721	0.258452	0.21329	0.255213	0.0746339	0.0577671
PRKCB	212	300	55	461	6	206.8		0.731719	0.663839	0.559387	0.453876	0.372491	0.295129	0.254813	0.283276	0.0990074	0.0798984
MAP3K13	159	114	198	279	284	206.8		0.518848	0.500322	0.330827	0.210335	0.089908	0.100892	0.0422847	0.143855	0.00787672	0.00331972
CDK5	392	61	169			207.333		0.714088	0.678211	0.562393	0.454186	0.344664	0.305993	0.236212	0.329341	0.0959618	0.0752054
PHKG1	194	187	19	192	447	207.8		0.67919	0.630582	0.51046	0.396245	0.301857	0.239342	0.19047	0.24162	0.0618036	0.0460276
PRKD1	360	106	191	85	298	208		0.615321	0.582933	0.442739	0.321521	0.212191	0.1766	0.119445	0.196962	0.0306832	0.0197545
MAP3K8	380	213	59	183		208.75		0.641853	0.62831	0.494811	0.375652	0.260238	0.225722	0.15908	0.250524	0.0496961	0.0343929
DYRK2	463	57	75	231	218	208.8		0.685375	0.65126	0.535885	0.423064	0.332188	0.262277	0.21575	0.259074	0.0744398	0.0569082
MAP4K5	126	455	435	23	11	210		0.745201	0.72167	0.629956	0.531259	0.460124	0.369926	0.337263	0.343912	0.153682	0.129966
PRKACA	123	283	311	185	148	210		0.503161	0.544011	0.376577	0.248428	0.122192	0.122194	0.0592487	0.161476	0.0115528	0.00539661
IKBKE	269	74	38	221	449	210.2		0.676273	0.664437	0.54963	0.436013	0.345208	0.272127	0.225785	0.267075	0.0789753	0.0605089
MAPK7	389	4	128		320	210.25		0.695735	0.689442	0.57895	0.469339	0.375772	0.309005	0.256679	0.310074	0.100808	0.0799865
ERBB4	25	264	297	316	152	210.8		0.591254	0.610635	0.470213	0.345159	0.23365	0.191539	0.133027	0.209424	0.0347691	0.0224958
SRPK3	112	254	292	312	86	211.2		0.5476	0.58899	0.436565	0.307833	0.187704	0.162208	0.0998981	0.189616	0.022934	0.0132499
PRKCA	295	236	279	86	160	211.2		0.501205	0.562153	0.396697	0.266097	0.13871	0.132705	0.0684737	0.169712	0.0137361	0.00672285
LMTK3	195		30	218	402	211.25		0.652203	0.671171	0.548337	0.431335	0.325135	0.271129	0.210183	0.283647	0.0732872	0.0543981
PLK3	205	475	76	232	73	212.2		0.657462	0.678456	0.562511	0.446728	0.354391	0.278841	0.231679	0.273006	0.0807378	0.0614121
GCK	287	136	215			212.667		0.51571	0.638747	0.471713	0.33769	0.160324	0.201055	0.0921758	0.27006	0.0266968	0.0121241
NEK4	149		116	250	336	212.75		0.535692	0.622971	0.466832	0.335213	0.195857	0.187953	0.108645	0.229511	0.0281212	0.015771
LRRK1	145	216	265		226	213		0.412058	0.571676	0.381255	0.243601	0.0809182	0.124365	0.0397458	0.189927	0.00830255	0.00243032
MASTL	255	131	119	480	83	213.6		0.643087	0.687551	0.570438	0.452904	0.359152	0.28221	0.234246	0.27617	0.0810577	0.0612147
ILK	430	15	136	253	234	213.6		0.627668	0.676893	0.554896	0.434647	0.336655	0.264822	0.214102	0.263345	0.0700802	0.0515334
CDK18		243	45	223	345	214		0.576726	0.662367	0.522422	0.3948	0.269932	0.234318	0.161914	0.26088	0.0483811	0.0318083
MAP4K2	224	51	163	267	367	214.4		0.545685	0.636804	0.491621	0.360169	0.242442	0.198311	0.136365	0.216864	0.03457	0.0216139
PDIK1L	358	206	260	184	65	214.6		0.517476	0.623825	0.470793	0.336494	0.212603	0.179277	0.114526	0.204108	0.0267105	0.0155348
OBSCN	346	469	9	149	100	214.6		0.674443	0.722986	0.618235	0.507894	0.424792	0.335802	0.295225	0.317471	0.117976	0.0943639
LATS1	366	118	202	97	292	215		0.531131	0.637387	0.489347	0.356057	0.235619	0.194059	0.13074	0.214451	0.0322415	0.0196777
TSSK3	97	112	196	277	393	215		0.551849	0.649218	0.507362	0.376376	0.260901	0.210695	0.149815	0.225837	0.0395218	0.0254162
MAP4K3	282	183	246	297	69	215.4		0.470102	0.610985	0.446188	0.307495	0.174499	0.156561	0.0882872	0.189693	0.0183276	0.00936988
PRKAA2	169	292	318	90	210	215.8		0.465029	0.614504	0.44918	0.309624	0.175753	0.15756	0.0888185	0.190748	0.0183836	0.00935769
MYO3B	256	309	48	35	431	215.8		0.639526	0.714522	0.601536	0.484902	0.394208	0.309572	0.263882	0.297685	0.09654	0.0742777
PRKCE	318	204	259	182	118	216.2		0.411929	0.595447	0.41616	0.273308	0.130638	0.132028	0.0612837	0.174427	0.0111523	0.0046341
PRKCG	431	29	149	257	216	216.4		0.592192	0.692834	0.566666	0.441633	0.338944	0.266091	0.212585	0.265824	0.0672261	0.0481581
FLT1	231	220	268	306	58	216.6		0.463084	0.62556	0.461521	0.320812	0.18679	0.164597	0.0954055	0.19618	0.0200897	0.0104317
CAMK2N1	225	139	24	215	484	217.4		0.623159	0.724706	0.610367	0.491717	0.399396	0.313147	0.266519	0.301053	0.0966033	0.0737038
ROR2	217	450	18	212	191	217.6		0.593412	0.709593	0.586664	0.46243	0.362218	0.283547	0.231698	0.279168	0.0763487	0.0556675
BUB1	57	252	290	105	387	218.2		0.550689	0.693691	0.559319	0.428066	0.317205	0.250002	0.191588	0.255496	0.055732	0.0378564
PAK2	9		466	380	20	218.75		0.706973	0.796235	0.709157	0.612118	0.540725	0.44753	0.412636	0.420533	0.207963	0.178571
ZAP70	351	20	140	254	330	219		0.549982	0.704105	0.571443	0.440274	0.330581	0.259611	0.201905	0.262804	0.0600484	0.0412285
RPS6KA3	69	273	303	317	138	220		0.471674	0.679012	0.52557	0.382988	0.253863	0.207486	0.139229	0.227803	0.0332208	0.0194194
EIF2AK1	374	85	179	433	30	220.2		0.613662	0.753594	0.642642	0.524447	0.434577	0.341069	0.296419	0.32341	0.1126	0.0869994
ULK3	48	271	301	453	32	221		0.611368	0.761776	0.65187	0.533936	0.444868	0.349385	0.305379	0.330096	0.117629	0.0912237
TRIB2	321	47	161	265	311	221		0.477702	0.695699	0.546449	0.404351	0.27817	0.223518	0.156541	0.239422	0.0391971	0.0237745
DTYMK	125	257	294	313	122	222.2		0.399599	0.678744	0.509384	0.356848	0.21153	0.182772	0.107129	0.213766	0.0219241	0.0108797
CDK20	425	111	17	69	489	222.2		0.660144	0.800815	0.707431	0.602338	0.528392	0.424608	0.391389	0.390813	0.181027	0.149982
MAP2K7	239	66		139	448	223		0.577709	0.77457	0.657773	0.534955	0.43128	0.350199	0.291593	0.347332	0.110281	0.083011
EPHA5	148	288	315	321	44	223.2		0.474093	0.723738	0.578717	0.435933	0.312165	0.246667	0.180754	0.25691	0.04771	0.029895
PINK1	418	151	224	289	41	224.6		0.509469	0.756719	0.625261	0.489207	0.378088	0.293875	0.235453	0.290707	0.0722898	0.0496638
HIPK3	128	203	258	302	238	225.8		0.283783	0.687375	0.491455	0.322215	0.148699	0.151641	0.066021	0.198506	0.0107187	0.00360011
RIOK3	186	71	173	412	288	226		0.467205	0.757009	0.616606	0.473221	0.352304	0.274713	0.210302	0.278289	0.0587879	0.0379599
STK33	31	267	299		309	226.5		0.480193	0.776414	0.639605	0.499655	0.370466	0.305455	0.229526	0.319356	0.071657	0.0471604
MAP3K5	134	94	486	78	348	228		0.561493	0.816537	0.706889	0.584768	0.494427	0.387707	0.343572	0.362101	0.134985	0.103649
CHEK2	303	314	334	187	4	228.4		0.468684	0.786964	0.6525	0.510534	0.394509	0.305208	0.24379	0.301216	0.0730592	0.0488819
MAP3K1	5	393	386	350	8	228.4		0.597138	0.834157	0.734808	0.621587	0.541253	0.430792	0.393777	0.396642	0.173055	0.138875
HIPK1	85	158	228	419	257	229.4		0.428241	0.785215	0.64154	0.49197	0.365457	0.283784	0.215933	0.287159	0.0586379	0.0367055
MERTK	46	147		402	323	229.5		0.521398	0.823096	0.704798	0.575754	0.468158	0.377388	0.316295	0.370845	0.11835	0.0869843
CHEK1	460	68	172	42	406	229.6		0.572044	0.836711	0.732924	0.615034	0.530179	0.418998	0.378917	0.387272	0.159106	0.125076
CSNK1E	386	7	103	244	418	231.6		0.529694	0.842644	0.731501	0.605773	0.513096	0.401221	0.355816	0.373726	0.138398	0.104809
RPS6KA1	229	233	63	193	442	232		0.435842	0.81856	0.682967	0.536375	0.417249	0.321195	0.25785	0.314898	0.0767055	0.0504849
TRIB1	280	312	110	248	215	233		0.261815	0.78231	0.597022	0.415626	0.237124	0.205887	0.112418	0.241131	0.0198665	0.00792216
LRRK2	153	289	78	233	412	233		0.407198	0.822015	0.680677	0.528502	0.402257	0.309674	0.241833	0.307675	0.0675877	0.0426036
MATK	420	1	92	238	414	233		0.540125	0.859572	0.753727	0.632022	0.544466	0.428783	0.387159	0.395815	0.159834	0.12374
MAPK14	38	472	451	133	75	233.8		0.573419	0.876352	0.780225	0.667561	0.589594	0.472059	0.437321	0.431399	0.200594	0.161667
SMG1	201	433	419	53	64	234		0.527222	0.865553	0.758246	0.634562	0.5453	0.428422	0.385691	0.395748	0.156921	0.120433
SGK2	284	14	135	421	317	234.2		0.475604	0.853789	0.733585	0.597852	0.49483	0.382669	0.330239	0.360565	0.116664	0.0838247
PXK	161	58	166	426	360	234.2		0.459644	0.849596	0.725189	0.585734	0.478083	0.36845	0.312818	0.350049	0.105489	0.0740082
PKMYT1	285	313	98	241		234.25		0.328178	0.824561	0.663497	0.496334	0.325416	0.281214	0.179452	0.312911	0.0439987	0.0221741
CSNK1G2	240	12	93	496	331	234.4		0.537555	0.872089	0.768091	0.647361	0.561419	0.443341	0.403017	0.407782	0.170043	0.132388
SCYL3	61	371	96	240	404	234.4		0.463745	0.852783	0.729869	0.591558	0.485485	0.374518	0.319986	0.35461	0.109724	0.0776051
LYN	369	383	86	236	103	235.4		0.421984	0.85308	0.721139	0.574007	0.457271	0.350636	0.288908	0.337902	0.0896632	0.0598384
MINK1		133	213	286	312	236		0.27565	0.834485	0.662419	0.48427	0.292131	0.264976	0.15189	0.305956	0.0334256	0.0142582
AAK1	331	122	206	283	239	236.2		0.243088	0.820805	0.637727	0.450636	0.268555	0.225888	0.128937	0.257486	0.0230333	0.00929258
ZAK	8	259	487	392	36	236.4		0.559027	0.895179	0.799759	0.686642	0.60902	0.488325	0.454117	0.445202	0.210528	0.169414
TBK1	109	280	308	319	166	236.4		0.2838	0.832751	0.663327	0.485198	0.320882	0.255883	0.166494	0.276004	0.0342121	0.0164207
VRK2	458	428	124	84	89	236.6		0.518255	0.887643	0.782718	0.659826	0.5725	0.451274	0.4102	0.414563	0.171749	0.132568
BRDT	173	400	392	153	70	237.6		0.427266	0.877734	0.751804	0.60792	0.497141	0.381646	0.32405	0.361483	0.10759	0.0740579
TBCK	218	193	121	251	407	238		0.308037	0.857843	0.699831	0.527635	0.376427	0.291241	0.208153	0.300068	0.0481981	0.0258325
PIM3	204	230	52	226	481	238.6		0.430664	0.888655	0.765616	0.623559	0.515725	0.396586	0.341099	0.37295	0.116988	0.0816865
DCLK2	142	432	418	132	71	239		0.467751	0.899555	0.786553	0.654029	0.557452	0.433732	0.386273	0.401235	0.148235	0.10935
MAP2K2	308	316	105	163	303	239		0.278516	0.864254	0.699847	0.520813	0.359627	0.280655	0.191922	0.29449	0.0412792	0.0205812
WEE1	202	442	427	54	72	239.4		0.495598	0.908296	0.802723	0.677523	0.588934	0.463492	0.421807	0.424886	0.175737	0.134416
HIPK4		228	99	242	389	239.5		0.34932	0.887659	0.745743	0.585992	0.439272	0.354527	0.265778	0.364153	0.0769692	0.0456766
DMPK	381	88	71	230	428	239.6		0.445289	0.901225	0.783805	0.646409	0.544679	0.421189	0.370094	0.391806	0.135205	0.0972211
PLK2	74		469	194	222	239.75		0.456074	0.907136	0.792896	0.659243	0.55307	0.441627	0.382049	0.423148	0.148084	0.107848
ARAF	32		467	108	352	239.75		0.527223	0.918611	0.821108	0.70474	0.619547	0.503165	0.45985	0.469847	0.21224	0.168636
PRKACB	265	239	282	46	368	240		0.330154	0.885441	0.738612	0.572945	0.434661	0.331192	0.255405	0.328068	0.0667462	0.0391323
NRK	409	340	350	76	26	240.2		0.467249	0.910635	0.799677	0.668393	0.573752	0.447551	0.401594	0.412356	0.157713	0.117218
JAK3		359	365	145	94	240.75		0.396184	0.907523	0.780581	0.633385	0.508847	0.404705	0.331323	0.398064	0.111954	0.0746513
PLK4	485	181	15	211	314	241.2		0.456266	0.918062	0.806253	0.673388	0.577522	0.449737	0.40299	0.414329	0.156788	0.115705
TRAF1	87	277	307	429	107	241.4		0.386279	0.909532	0.78081	0.630561	0.514633	0.392836	0.331812	0.371708	0.106513	0.0710522
NEK6	227	227	274	308	175	242.2		0.132651	0.880555	0.673478	0.453877	0.218244	0.209209	0.0893958	0.257287	0.0120956	0.0028108
PRKCZ	372	26	146	255	424	244.6		0.410492	0.943519	0.826965	0.686441	0.583983	0.450804	0.399559	0.416171	0.1471	0.104629
TSSK2	304	479	94		102	244.75		0.46012	0.950834	0.846545	0.719651	0.624921	0.501586	0.451201	0.470087	0.193131	0.146285
MAP4K4	120	282	310	320	194	245.2		0.203738	0.929523	0.757782	0.560016	0.376953	0.29356	0.190991	0.310213	0.036362	0.0155397
LMTK2	262	163	232	436	139	246.4		0.283188	0.950404	0.805412	0.632332	0.490618	0.369336	0.290581	0.359172	0.0758268	0.0433226
ACVR1B	98	62	493	393	188	246.8		0.451201	0.965874	0.862323	0.734845	0.64684	0.510009	0.469496	0.463643	0.200208	0.151876
EPHA1	356	223	57	173	425	246.8		0.357222	0.959735	0.834599	0.682591	0.56842	0.433113	0.373474	0.403855	0.123875	0.0826961
TXK	221	408	399	39	168	247		0.38281	0.963259	0.844599	0.699667	0.593693	0.456154	0.402496	0.421091	0.144139	0.100322
CSNK1G3	270	310	332		78	247.5		0.289762	0.963988	0.825366	0.657189	0.507052	0.401045	0.308326	0.402305	0.0884121	0.0505865
MARK1	377	250	37	220	354	247.6		0.323953	0.965502	0.833788	0.673545	0.550012	0.415881	0.349521	0.391934	0.106801	0.0676823
ACVR1	117	176	242	296	409	248		0.26059	0.96627	0.818812	0.640563	0.493294	0.370265	0.287602	0.361293	0.0721202	0.0397045
FRK	419	64	171	268	319	248.2		0.323251	0.971389	0.840739	0.680976	0.558517	0.422406	0.3568	0.396933	0.110223	0.0701779
ULK4	395	449	22	172	211	249.8		0.401692	0.988498	0.879008	0.742469	0.646756	0.503635	0.457745	0.458767	0.181871	0.132391
Rpl11	272	99	190	273	422	251.2		0.260275	1	0.859832	0.684848	0.545595	0.407782	0.330034	0.389039	0.0889465	0.0510524
KDR	271	199	256	428	110	252.8		0.243692	0.983415	0.875718	0.697288	0.555072	0.413479	0.333394	0.394235	0.0879292	0.0493375
BMX	300	98	189	476	203	253.2		0.311524	0.981484	0.894986	0.737913	0.622258	0.471871	0.411213	0.43539	0.136172	0.0888559
TNNI3K	361	328	83	140	355	253.4		0.279949	0.978596	0.890875	0.724631	0.598449	0.44944	0.380905	0.419338	0.11495	0.0707297
KSR2	72	198	255	481	266	254.4		0.315991	0.970934	0.908797	0.754565	0.642826	0.489302	0.431612	0.448844	0.148304	0.0984897
NEK8	81	190	494	394	116	255		0.386729	0.969636	0.926033	0.792093	0.701066	0.550027	0.508052	0.496909	0.212817	0.156745
MOS	345	219	10	430	280	256.8		0.327354	0.951254	0.935178	0.787361	0.683699	0.525501	0.474058	0.477267	0.175961	0.121104
EIF2AK3	244	224	271	459	88	257.2		0.262446	0.942013	0.931055	0.764307	0.640529	0.480494	0.413509	0.443684	0.127728	0.0786468
FGR	353	110	195	276	353	257.4		0.190218	0.932699	0.923181	0.731656	0.576711	0.42462	0.334325	0.405928	0.0799385	0.0406273
FGFR3	254	226	273	178	357	257.6		0.0996771	0.919043	0.909573	0.677045	0.454231	0.344295	0.211445	0.358553	0.0324499	0.00987243
MAP3K15	486	238	281	87	200	258.4		0.288743	0.934122	0.947007	0.790048	0.677883	0.5147	0.456685	0.469376	0.15663	0.102493
MAST4	474	38	500	58	223	258.6		0.446005	0.949039	0.962782	0.848269	0.775113	0.6306	0.601827	0.566888	0.303049	0.240837
LCK	141	212	263	437	240	258.6		0.196035	0.921236	0.938981	0.751269	0.602889	0.443909	0.358022	0.419626	0.0900125	0.0474363
ATR	95	486	462	177	81	260.2		0.396112	0.932965	0.971919	0.846968	0.765682	0.61205	0.57772	0.549356	0.26789	0.204437
CLK3	457	164	233	292	156	260.4		0.220787	0.907453	0.962656	0.786471	0.654318	0.485617	0.411733	0.449254	0.118095	0.0682476
ACVRL1	326	73	174	269	464	261.2		0.279898	0.909528	0.97476	0.819001	0.709781	0.540245	0.484523	0.489637	0.170698	0.1124
SGK223	421	154	40	204	491	262		0.365511	0.916452	0.985348	0.85478	0.769318	0.60968	0.572452	0.546703	0.25457	0.189589
NRBP2	140	255	293	208	420	263.2		0.162628	0.869941	0.992764	0.798462	0.64659	0.47138	0.381172	0.441941	0.0923525	0.0461756
Aldoa	397	217	266	305	134	263.8		0.144991	0.859832	1	0.7989	0.638644	0.463177	0.366125	0.4373	0.0828945	0.0389034
PRKD3	75	275	305	422	243	264		0.209407	0.872806	0.997828	0.827293	0.699725	0.519493	0.448647	0.475297	0.133121	0.0776155
EGFR	320	318	337	109	237	264.2		0.136559	0.853653	0.994935	0.800686	0.636405	0.460429	0.360024	0.436022	0.0789154	0.0358495
STK31	434	448	109	247	92	266		0.306742	0.877729	0.980682	0.878125	0.785024	0.612427	0.569638	0.548032	0.234203	0.165719
PTK2B	443		90			266.5		0.438294	0.910368	0.982745	0.913849	0.837709	0.717273	0.668636	0.683995	0.372186	0.298522
CAMKK1	139	161	503	400	137	268		0.298965	0.86189	0.963281	0.896086	0.804321	0.628666	0.587031	0.561395	0.244218	0.172908
VRK1	298	376	504	10	157	269		0.337205	0.864523	0.958278	0.912758	0.830943	0.662972	0.629058	0.591536	0.290092	0.21617
IRAK3	447	232	495	44	128	269.2		0.346119	0.865438	0.957523	0.916065	0.836318	0.670334	0.637963	0.598244	0.300664	0.226389
CDC42BPG	354	445	428	27	93	269.4		0.343059	0.863445	0.955767	0.917291	0.837193	0.670479	0.637868	0.598251	0.29947	0.224953
CSNK1A1	402	337	34	135	439	269.4		0.302462	0.853199	0.952042	0.910219	0.821454	0.645638	0.606443	0.57569	0.259873	0.186208
PBK	250	308	331	138	321	269.6		0.0882079	0.781887	0.920903	0.857956	0.677491	0.480148	0.362048	0.454822	0.067668	0.0251891
AKT3	47	431	417	125	328	269.6		0.29723	0.850488	0.949908	0.911173	0.821514	0.644446	0.604558	0.574553	0.256588	0.182804
STK32A	475	352	360	131	34	270.4		0.308957	0.848299	0.944744	0.920641	0.834808	0.659989	0.623137	0.588026	0.275083	0.199699
MYLK3	355	326	35	219	417	270.4		0.238108	0.828284	0.936345	0.908325	0.804854	0.614619	0.563376	0.549089	0.206937	0.135341
EIF2AK2		382	380	93	227	270.5		0.224357	0.828668	0.934525	0.90771	0.795459	0.61352	0.547046	0.563753	0.195791	0.1227
CDK11B	267	200	257	301	329	270.8		0.041906	0.742693	0.889912	0.853971	0.613917	0.435074	0.269619	0.431982	0.0338868	0.00685198
BRSK1	387	234	277	117	340	271		0.131521	0.786911	0.913146	0.891871	0.748114	0.540346	0.452937	0.494265	0.112653	0.0553532
BRSK2	198	464	444	197	54	271.4		0.294043	0.837622	0.935088	0.927573	0.83993	0.661218	0.623017	0.588594	0.269444	0.192947
TRIM33	104		472	148	363	271.75		0.295774	0.839602	0.933229	0.931557	0.842162	0.6705	0.625466	0.608451	0.274955	0.196598
PTK6	324	411	1	210	416	272.4		0.281607	0.827372	0.925423	0.935151	0.84623	0.664063	0.624898	0.590603	0.266154	0.188472
TAOK3	398	63	170		460	272.75		0.316137	0.838914	0.92844	0.942965	0.859785	0.691794	0.652291	0.626404	0.303891	0.224125
RIPK3	151	390	384	349	91	273		0.207072	0.798748	0.907723	0.930782	0.82333	0.622816	0.567873	0.555444	0.198408	0.124553
SPEG	455	11	133	424	344	273.4		0.319138	0.832407	0.923499	0.948511	0.868871	0.695946	0.66402	0.619392	0.312236	0.232461
PRKY	327	117	201	281	441	273.4		0.164661	0.779656	0.894946	0.928685	0.807443	0.596878	0.529193	0.535425	0.160178	0.0909258
MAPK4	413	341	100	243		274.25		0.20139	0.793764	0.896589	0.943987	0.833363	0.639949	0.573858	0.584479	0.203593	0.124944
MUSK	448		479	11	161	274.75		0.380422	0.845589	0.924391	0.964789	0.896337	0.743236	0.715937	0.672991	0.385785	0.305979
AKT1	163	231	276	460	249	275.8		0.130027	0.744556	0.860832	0.952494	0.823173	0.598575	0.521916	0.537415	0.142706	0.0740162
ATG7	483	186	249	298	165	276.2		0.162498	0.756593	0.867086	0.960604	0.845616	0.628527	0.565852	0.559804	0.179234	0.103845
LTK	241	159	229	290	463	276.4		0.134747	0.741946	0.856292	0.960288	0.834863	0.609784	0.536678	0.545729	0.151877	0.0807322
TIE1	86	276	306	318	397	276.6		0.136616	0.741247	0.854919	0.962857	0.83881	0.613714	0.541884	0.548665	0.155287	0.0832832
ERBB2	470	16		401	220	276.75		0.328936	0.819539	0.902732	0.976798	0.901799	0.735903	0.703545	0.664298	0.352796	0.268385
EPHA2	385	103	490	126	282	277.2		0.244472	0.783309	0.880319	0.976425	0.886589	0.692267	0.652477	0.61298	0.271779	0.187349
FES	422	77	39	464	384	277.2		0.320846	0.810908	0.897365	0.979864	0.905197	0.733097	0.705133	0.652206	0.3487	0.264026
SGK1	384	470	449	57	29	277.8		0.345905	0.81618	0.898621	0.985369	0.915578	0.750796	0.726258	0.669756	0.379114	0.294594
CAMKK2	263	121	205	434	369	278.4		0.151094	0.734343	0.842583	0.984544	0.870904	0.646286	0.584118	0.573536	0.1844	0.105527
MARK3	228	205		403		278.667		0.153614	0.756347	0.847815	0.987998	0.866378	0.670668	0.574392	0.631059	0.18971	0.0985767
CSF1R	200	299	324		295	279.5		0.0510751	0.676826	0.78433	0.995668	0.815539	0.58061	0.42471	0.551793	0.0758712	0.019625
ADCK5		360	366	129	264	279.75		0.132187	0.724052	0.825271	0.999435	0.878711	0.656243	0.57489	0.598307	0.173977	0.0910475
Pgk1	306	315	335	330	113	279.8		0.0858178	0.684848	0.7989	1	0.860692	0.609678	0.518369	0.547093	0.120494	0.0528597
LATS2	379	184	247	156	434	280		0.13804	0.715367	0.822508	0.99775	0.88795	0.655858	0.592248	0.580846	0.182585	0.101891
TRIB3		370	70	229	452	280.25		0.244007	0.769439	0.858405	0.99605	0.917405	0.727275	0.684358	0.654018	0.298642	0.207337
CDK15	138	65		446	473	280.5		0.323465	0.797615	0.877476	0.99479	0.933945	0.766785	0.737726	0.690916	0.381425	0.292536
NEK2	428	344	353	75	209	281.8		0.170279	0.719595	0.819753	0.979487	0.920503	0.698324	0.648787	0.615073	0.233637	0.144595
LIMK1	116	420	408	360	106	282		0.207409	0.736708	0.832068	0.979282	0.930308	0.721973	0.681553	0.63614	0.276048	0.184249
AURKB	261	140	216	488	307	282.4		0.148183	0.703426	0.805242	0.972032	0.922856	0.691143	0.636152	0.608593	0.213668	0.125631
TSSK6	160	290	316	322	324	282.4		0.0457894	0.627434	0.738597	0.961596	0.879564	0.598729	0.476799	0.542191	0.0828822	0.0257167
TPD52L3	268	218	267	438	224	283		0.0715608	0.646693	0.755019	0.957432	0.906942	0.637247	0.544899	0.567594	0.122833	0.0511563
STK16	444	153	225	413	181	283.2		0.156136	0.702329	0.801969	0.964363	0.934607	0.705402	0.654411	0.620214	0.229644	0.138813
ALK	230	399	391	146	250	283.2		0.10431	0.670117	0.775221	0.959228	0.922231	0.669177	0.598317	0.590755	0.167213	0.0848501
MAK	83		470	381	199	283.25		0.246084	0.752581	0.837646	0.970602	0.948187	0.757542	0.719581	0.679202	0.327991	0.232024
TTK		361	367	124	281	283.25		0.125826	0.694607	0.790064	0.961436	0.926521	0.692599	0.618005	0.625376	0.193635	0.102813
TGFBR1	181	401	393	425	23	284.6		0.236116	0.734704	0.823383	0.958452	0.96094	0.762925	0.730964	0.672797	0.330444	0.233744
PASK	278	311	333	329	179	286		0.0344498	0.580919	0.682332	0.905779	0.944329	0.63265	0.507253	0.566713	0.0828852	0.0228689
PSKH1	445	67	104	432	382	286		0.24865	0.73289	0.81856	0.948369	0.975075	0.781992	0.753345	0.690453	0.356569	0.258011
MAP4K1	365	195	253	493	129	287		0.161093	0.680117	0.773627	0.927752	0.980024	0.750612	0.707672	0.657159	0.268992	0.169194
NEK11	152	396	389	352	146	287		0.127236	0.658371	0.754882	0.921376	0.9778	0.731083	0.678501	0.639352	0.227383	0.130709
IGF1R	190	298	323	483	142	287.2		0.137242	0.663749	0.759114	0.921384	0.980939	0.739448	0.690444	0.646589	0.241758	0.143415
YSK4	100	278		404	371	288.25		0.153284	0.676571	0.762618	0.915179	0.993678	0.76419	0.712932	0.680694	0.269697	0.16434
EPHB6	407	412	95	239		288.25		0.182714	0.693099	0.77737	0.920779	0.994209	0.778143	0.73487	0.693216	0.304571	0.198839
CAMK2D	162	291	317	323	350	288.6		0.0411206	0.56772	0.663448	0.873278	0.996344	0.678718	0.574882	0.59815	0.109985	0.0364373
CAMK2B	450		480	159	66	288.75		0.286579	0.741397	0.816887	0.933051	0.999599	0.823175	0.797824	0.738329	0.419795	0.319191
Nono	368	208	261	303	304	288.8		0.0275855	0.545595	0.638644	0.860692	1	0.661833	0.53551	0.587285	0.083807	0.0210805
NEK9	294	241	284	310	315	288.8		0.0125914	0.513385	0.600057	0.843166	1	0.629053	0.451249	0.568204	0.047588	0.00563239
SIK1	106	483	459	55	342	289		0.26378	0.724622	0.805521	0.92767	0.99833	0.815468	0.791468	0.721748	0.400004	0.298107
ERN1	342	180	489	164	274	289.8		0.130015	0.641769	0.733817	0.894066	0.988105	0.764802	0.718658	0.666536	0.255681	0.15169
STK17B	188	221	269	307	470	291		0.0860187	0.598279	0.690493	0.866775	0.969522	0.751866	0.692089	0.653158	0.204083	0.103625
EPHB3	341	422	410	134	149	291.2		0.140138	0.640175	0.729563	0.883691	0.972734	0.785657	0.744742	0.684403	0.281549	0.173478
GRK4	293	214	264	304	385	292		0.0270008	0.517537	0.602595	0.81513	0.935826	0.707427	0.595457	0.618482	0.10023	0.0270497
ABL2	247	235	278		408	292		0.056217	0.577528	0.656597	0.8422	0.946499	0.748155	0.655784	0.666186	0.159687	0.060567
TEX14	33	386	382	189	475	293		0.210604	0.675409	0.757209	0.887513	0.961484	0.83295	0.806705	0.731985	0.381624	0.270831
TRPM6	235	304	327	326	278	294		0.0127242	0.467395	0.539618	0.762565	0.873329	0.710134	0.566169	0.620973	0.0692605	0.0105265
CDK7	288		476	386	27	294.25		0.241435	0.692718	0.766567	0.886494	0.953575	0.855581	0.830626	0.763217	0.424675	0.313281
MST4	127	440		127	486	295		0.240404	0.688597	0.761816	0.881069	0.947412	0.861677	0.837394	0.768516	0.430556	0.318136
RIPK1	99		471	382	231	295.75		0.18161	0.650668	0.726269	0.858921	0.931648	0.851066	0.819809	0.753665	0.373431	0.254131
CDC42BPB	17	380	379	444	262	296.4		0.180623	0.638889	0.719321	0.852846	0.926893	0.855053	0.828735	0.748041	0.380347	0.262209
LIMK2		188	250	299	451	297		0.0896303	0.575841	0.649883	0.809123	0.891023	0.829349	0.776937	0.72768	0.260289	0.136566
MAPKAPK3	180	297	322	324	366	297.8		0.0274605	0.473567	0.546371	0.74052	0.832208	0.791608	0.708364	0.677359	0.139734	0.0437511
MAPK9	316	480	457	29	213	299		0.203739	0.64155	0.717842	0.841885	0.909836	0.885367	0.864214	0.778313	0.431065	0.310863
PKN1	18	439	425	365	258	301		0.174023	0.61136	0.687434	0.8162	0.885401	0.896217	0.874104	0.783805	0.41706	0.290737
NTRK1	248	179	244	467	375	302.6		0.0721065	0.509653	0.583873	0.7417	0.81882	0.88321	0.846174	0.755022	0.285936	0.152457
YES1	264	197	254	484	326	305		0.0597573	0.479857	0.549383	0.707112	0.779231	0.906835	0.871605	0.771292	0.284612	0.144965
PSK	449	229	275	309	265	305.4		0.0323718	0.432502	0.494347	0.663726	0.729704	0.900303	0.853876	0.758314	0.218053	0.0860332
ABL1	482	357	491	94	104	305.6		0.201115	0.610364	0.68093	0.79734	0.858937	0.940884	0.924923	0.829274	0.490745	0.361609
PEAK1	209	476	454	188	204	306.2		0.110016	0.531574	0.603496	0.741866	0.810471	0.932499	0.909397	0.804447	0.385652	0.242934
EPHA7	328	246	287	418	255	306.8		0.0200185	0.395135	0.447902	0.620256	0.67214	0.912249	0.861242	0.762423	0.185647	0.0584294
JAK2	459	167	235	293	381	307		0.063942	0.474429	0.542043	0.693952	0.762192	0.931355	0.901866	0.792367	0.313662	0.167056
SNRK	165	373	373	462	164	307.4		0.0914684	0.506044	0.575911	0.717808	0.785518	0.941438	0.917671	0.807954	0.368842	0.221652
ALPK1	479	355	362	343	3	308.4		0.163002	0.569073	0.638685	0.760162	0.822286	0.960031	0.944005	0.840118	0.476311	0.337149
MAP2K1	301	404	396	110	337	309.6		0.064601	0.461514	0.526144	0.672604	0.73611	0.960797	0.936846	0.817002	0.341949	0.187201
CDK10	344	86	180	466	479	311		0.146744	0.543981	0.611587	0.733372	0.793936	0.981262	0.9666	0.856356	0.482876	0.336854
CAMK2G	281	374	374	101	426	311.2		0.0743139	0.466454	0.530669	0.671014	0.732632	0.979137	0.959427	0.83561	0.378112	0.219368
CSNK1D	393	166	234	495	276	312.8		0.0749721	0.459566	0.522202	0.65948	0.718755	0.995875	0.978835	0.850286	0.396361	0.233391
Cpne1	219	225	272	439	411	313.2		0.0423623	0.407782	0.463177	0.609678	0.661833	1	0.980476	0.841129	0.32688	0.160233
SRMS	333	245	286	440	263	313.4		0.0205555	0.35805	0.402125	0.555634	0.589833	0.99735	0.979784	0.830831	0.2514	0.0912371
MET	275	478	456	4	356	313.8		0.169104	0.552071	0.617158	0.730576	0.787236	0.995241	0.993172	0.883472	0.535111	0.390076
DBF4	146		473	383	256	314.5		0.0987609	0.492037	0.547473	0.67351	0.723347	0.987838	0.998922	0.878285	0.450083	0.283058
Arhgdia	426	248	289	311	299	314.6		0.0138516	0.330034	0.366125	0.518369	0.53551	0.980476	1	0.838066	0.227533	0.068851
ITK	164		498	397	205	316		0.117497	0.504653	0.560599	0.680364	0.72992	0.97534	0.986049	0.894122	0.492669	0.328239
KIT	226	303	326	494	233	316.4		0.042513	0.392175	0.44417	0.583869	0.630556	0.963261	0.975528	0.8718	0.362432	0.184129
CDK13	41	395	388	351	410	317		0.103097	0.474945	0.53629	0.659706	0.71502	0.964992	0.975512	0.894422	0.487001	0.320857
TNK2	34	458	438	473	186	317.8		0.168906	0.536851	0.599	0.707835	0.761226	0.964424	0.973462	0.913108	0.572757	0.423212
TAOK1	315	467	447	158	202	317.8		0.0780012	0.440858	0.499128	0.62714	0.680092	0.954413	0.96423	0.895329	0.455714	0.280967
PRKAR2A	236	305	328	327	395	318.2		0.00892677	0.290201	0.314911	0.457146	0.4468	0.927521	0.929117	0.871821	0.227834	0.0580035
BCKDK		482	13		465	320		0.274613	0.62304	0.672403	0.759355	0.799616	0.95946	0.965275	0.945064	0.674007	0.547713
STYK1	242	306	329	328	396	320.2		0.00783402	0.274496	0.295062	0.43122	0.410973	0.897971	0.888532	0.892266	0.238727	0.0590891
PDGFRB	286	375	375	442	124	320.4		0.0533398	0.392984	0.444342	0.573673	0.618667	0.923014	0.928407	0.912291	0.43511	0.246219
SLK	468	481	458	142	57	321.2		0.171959	0.527552	0.587364	0.691932	0.742681	0.939896	0.947041	0.937905	0.607233	0.455206
TESK2	55	487	463	489	114	321.6		0.192138	0.543728	0.603037	0.703722	0.753427	0.939916	0.946872	0.942924	0.628648	0.48196
RIOK2	156	460	440	372	180	321.6		0.0778849	0.424819	0.479844	0.601903	0.650552	0.918621	0.923935	0.927862	0.496801	0.313582
NEK5	2	416	404	357	444	324.6		0.128917	0.474137	0.531067	0.639419	0.68827	0.906739	0.911443	0.958037	0.596542	0.427321
MAP2K6	119	281	309	441	478	325.6		0.0696207	0.397363	0.447952	0.565551	0.60881	0.879361	0.879782	0.960417	0.526465	0.331365
ULK2	350	325	342	333	289	327.8		0.00225752	0.196888	0.193828	0.300149	0.20833	0.768509	0.687289	0.971057	0.232808	0.0285004
GRK7	174	294	319	477	376	328		0.0335744	0.323232	0.361311	0.480252	0.506213	0.833786	0.823004	0.978106	0.471482	0.249816
BMPR2	179	296	321	468	380	328.8		0.0293446	0.31011	0.345399	0.463156	0.484563	0.821282	0.807138	0.985202	0.467244	0.239884
IRAK4	246	387	383	348	283	329.4		0.0073185	0.230583	0.242846	0.354578	0.322491	0.773815	0.72662	0.989567	0.344517	0.103551
BRD2	478	141	123	490	415	329.4		0.117961	0.44588	0.499147	0.60377	0.648796	0.867568	0.869004	0.992749	0.631769	0.452853
CDK1	26	419	407	359	438	329.8		0.102319	0.42612	0.477975	0.584555	0.628386	0.858475	0.858614	0.995504	0.618234	0.431864
MAP3K10	168	461	441	373	207	330		0.0543164	0.356466	0.400519	0.51385	0.548933	0.831251	0.824627	0.996614	0.54732	0.334126
SRPK2	423	394	387	103	343	330		0.0492844	0.347497	0.390123	0.504069	0.537215	0.827567	0.81966	0.996562	0.536685	0.3201
DYRK4	477	354		160		330.333		0.102061	0.450266	0.48405	0.585156	0.604742	0.858109	0.847244	0.999551	0.614035	0.413526
Hnrnpd	427	447	430	95	253	330.4		0.0758906	0.389039	0.4373	0.547093	0.587285	0.841129	0.838066	1	0.589341	0.388538
FER	53	474	453	377	297	330.8		0.0975205	0.416813	0.46758	0.573681	0.616373	0.848739	0.84785	0.996982	0.622676	0.432725
UHMK1	215	302	325	325	490	331.4		0.0224977	0.281905	0.310973	0.423806	0.434642	0.785207	0.761863	0.990548	0.473543	0.230724
ADCK2		258	295	314	461	332		0.0230391	0.299225	0.316889	0.42516	0.409999	0.783679	0.746283	0.98586	0.473788	0.215628
PRKG1	234		474	384	244	334		0.0399836	0.329678	0.356499	0.462103	0.468886	0.785251	0.759887	0.970193	0.555213	0.310914
SCYL2	416	342	351	338	229	335.2		0.00713158	0.207664	0.216362	0.315037	0.280312	0.702737	0.639701	0.95051	0.422445	0.142537
INSRR	62	484	460	209	462	335.4		0.116798	0.425736	0.475391	0.573644	0.614691	0.824679	0.823092	0.964611	0.68852	0.503223
EPHA3	213	247	288	451	483	336.4		0.0358648	0.297993	0.331548	0.436461	0.457002	0.755824	0.73595	0.947239	0.581316	0.337059
CLK4	401	336	348	337	261	336.6		0.00366682	0.178273	0.177477	0.26691	0.204962	0.663655	0.571083	0.933674	0.38948	0.0968587
ICK	289	402	394	448	151	336.8		0.0325722	0.28909	0.320864	0.4251	0.442826	0.747672	0.725394	0.943083	0.577358	0.328208
ALPK2	429	397	33	463	373	339		0.089061	0.38004	0.425055	0.522763	0.559055	0.783823	0.777514	0.936063	0.696155	0.492025
CDK3	176	295	320	482	429	340.4		0.0303429	0.272108	0.300763	0.399427	0.412984	0.712066	0.684938	0.911404	0.616239	0.354777
NEK7	158	441	426			341.667		0.0833489	0.390848	0.415477	0.505805	0.511883	0.766558	0.740477	0.924171	0.708064	0.481647
CLK2	276	398	390	353	294	342.2		0.00366347	0.16047	0.158065	0.236432	0.178549	0.59849	0.496178	0.875532	0.476773	0.13853
CHUK	408	339	26	478	467	343.6		0.0965338	0.377146	0.420708	0.512873	0.547567	0.758176	0.751135	0.905597	0.748359	0.545065
STK24		379	378	443	177	344.25		0.0314343	0.277298	0.294877	0.385351	0.378298	0.684979	0.641613	0.885721	0.660284	0.378983
MAPK15	243	307	330	454	392	345.2		0.00838746	0.183	0.190099	0.272047	0.243703	0.603063	0.532077	0.853482	0.584073	0.251029
MAP3K14	305	418	406	358	241	345.6		0.00640052	0.170589	0.174038	0.252537	0.215342	0.586458	0.504645	0.846709	0.571276	0.225734
DYRK3	232	465	445	186	401	345.8		0.0325055	0.2614	0.288534	0.379959	0.392618	0.670932	0.641813	0.867506	0.688792	0.419012
ADRBK2	238	413	402	487	193	346.6		0.0297067	0.252282	0.277651	0.36763	0.377605	0.659069	0.627234	0.859393	0.692306	0.416006
TEK	175	462	442	458	197	346.8		0.0480736	0.291992	0.324703	0.41588	0.437287	0.688258	0.667662	0.867376	0.728387	0.47949
NUAK1	283		475	385	245	347		0.0225104	0.246604	0.25732	0.342094	0.321644	0.643603	0.585858	0.859214	0.670598	0.362144
AURKA		362		406	277	348.333		0.0157067	0.250415	0.239168	0.314743	0.232449	0.624918	0.511939	0.857407	0.651553	0.275504
NEK1	279	424	412	175	453	348.6		0.02359	0.230383	0.251345	0.337348	0.340371	0.62897	0.589864	0.838713	0.702219	0.408868
RPS6KC1	277	453	433	409	172	348.8		0.0250593	0.233999	0.255813	0.341956	0.346567	0.631094	0.593585	0.838239	0.70867	0.418374
PRKD2	359	327	343	334	386	349.8		0.000991853	0.107515	0.0930231	0.144751	0.064559	0.467046	0.297621	0.787067	0.522697	0.0887266
MAPK8	464	377	376	157	377	350.2		0.0206656	0.217444	0.235793	0.31874	0.317651	0.608044	0.564371	0.822931	0.714837	0.410397
STK38L	336	321	339	485	271	350.4		0.00697117	0.161292	0.164638	0.236742	0.203791	0.545225	0.464163	0.802671	0.652406	0.286993
RIOK1	399	369	372	347	267	350.8		0.00228737	0.123907	0.115659	0.174738	0.11221	0.489457	0.360806	0.784831	0.592423	0.172991
ROS1	50	459	439	371	435	350.8		0.0684052	0.317353	0.353359	0.440095	0.466406	0.686376	0.671408	0.847776	0.794039	0.563382
RPS6KA6	390	334	499	398	136	351.4		0.0330245	0.247678	0.272712	0.357283	0.368118	0.629302	0.598073	0.823692	0.757584	0.479561
JAK1	170	421	409	361	398	351.8		0.0147407	0.193265	0.206141	0.284066	0.273169	0.574665	0.51985	0.802907	0.716796	0.388601
FAS			484	169	403	352		0.0738702	0.348369	0.367057	0.447522	0.445794	0.690976	0.65503	0.856721	0.803585	0.560521
AMHR2	347	435	421	408	153	352.8		0.0205533	0.210508	0.227878	0.307497	0.305694	0.58738	0.54258	0.801567	0.748628	0.438598
NLK	454	348	49	431	485	353.4		0.0719522	0.316682	0.352289	0.43643	0.462483	0.674244	0.659542	0.832061	0.822503	0.593568
BUB1B	290	403	395		327	353.75		0.00503298	0.159123	0.147192	0.208012	0.134426	0.508271	0.375836	0.782618	0.676127	0.240973
MARK4	296	466	446	207		353.75		0.03035	0.247901	0.261718	0.340384	0.330372	0.609918	0.560126	0.812794	0.776057	0.476295
TEC	467		482	390	77	354		0.0902552	0.350315	0.382293	0.463563	0.484117	0.691111	0.673451	0.841607	0.837927	0.619647
PAK1	220	417	405	470	259	354.2		0.0157343	0.191041	0.204126	0.279625	0.270368	0.559626	0.506205	0.784217	0.753396	0.423654
FGFR2	222	426	414	362	347	354.2		0.00647195	0.149183	0.150921	0.216992	0.18337	0.50809	0.423436	0.76703	0.708332	0.323077
MLKL	52	473	452	376	427	356		0.0645656	0.298577	0.3317	0.413476	0.4367	0.649585	0.632246	0.811203	0.842368	0.604586
INSR	339	444	31	479	487	356		0.0837377	0.32858	0.365107	0.446586	0.47392	0.671944	0.659413	0.821164	0.854442	0.634781
MYLK4	196	452	432	367	334	356.2		0.0121083	0.172367	0.181374	0.251792	0.235446	0.527897	0.465552	0.761913	0.768704	0.417496
PNCK	348	323	340	331	445	357.4		0.00180378	0.103722	0.0936586	0.141484	0.0827543	0.418405	0.283356	0.718072	0.702537	0.221657
STK39	453	347	356	475	162	358.6		0.021564	0.200009	0.216297	0.289618	0.288107	0.548382	0.503745	0.757304	0.825064	0.509235
BRD4	349	324	341	332	458	360.8		0.00197724	0.0993367	0.0900542	0.134991	0.0817174	0.394239	0.266503	0.68781	0.770582	0.275106
NEK10	437	253	291	452	390	364.6		0.00626161	0.126435	0.126535	0.180215	0.150301	0.426046	0.342711	0.67751	0.869864	0.452636
OXSR1	208	410	401	355	457	366.2		0.00762703	0.131118	0.13305	0.187394	0.162172	0.427096	0.350966	0.669693	0.898027	0.494203
STK40	307	489	465	379	195	367		0.0160263	0.164934	0.175263	0.237127	0.228196	0.471893	0.418758	0.685722	0.922148	0.576436
DYRK1A	378	332	346	336	450	368.4		0.00122392	0.0767732	0.0655173	0.0985497	0.0492583	0.316432	0.184042	0.612309	0.904128	0.330968
GSG2	364	385		407	325	370.25		0.00190024	0.0982394	0.0800858	0.113692	0.0462795	0.335729	0.177308	0.630866	0.941166	0.337391
DAPK1	411	456	436	369	182	370.8		0.0109451	0.138662	0.143906	0.198097	0.181465	0.421664	0.358398	0.645618	0.966381	0.588222
MAST2	484	358	364	344	305	371		0.00231809	0.086255	0.078553	0.115529	0.0742224	0.328884	0.219392	0.602742	0.958923	0.442336
MAST1	370	330	344	335	476	371		0.00178662	0.0804512	0.0713111	0.105741	0.0619665	0.316273	0.199269	0.597337	0.957133	0.414718
CASK	334	409	400	354	359	371.2		0.000603881	0.0616764	0.0483177	0.0734481	0.0254668	0.26963	0.125135	0.576689	0.953559	0.292741
EIF2AK4	330	320		405	430	371.25		0.00308985	0.107664	0.0926448	0.13007	0.0688471	0.351649	0.213608	0.631336	0.96331	0.421331
TP53RK	376	415	403	356	313	372.6		0.000774079	0.0634166	0.0510584	0.0770891	0.0309787	0.270236	0.134819	0.568677	0.983832	0.347018
RPS6KA2	476	353	361	342	333	373		0.00154248	0.0746809	0.0650243	0.0965527	0.0535847	0.296934	0.179178	0.578005	0.992752	0.431723
Actb	440	345	354	456	272	373.4		0.00297747	0.0889465	0.0828945	0.120494	0.083807	0.32688	0.227533	0.589341	1	0.505044
PRPF4B	319	430	416	472	235	374.4		0.006209	0.10979	0.109201	0.153933	0.12803	0.363226	0.285524	0.601626	0.98583	0.586717
CDC2L2	473	351	359	341	361	377		0.00114672	0.0642224	0.0538615	0.0801033	0.0395098	0.260442	0.143017	0.540039	0.933049	0.469858
ATG5	435	384	381	191	494	377		0.0103782	0.12633	0.130352	0.178841	0.162457	0.382756	0.320627	0.6003	0.954392	0.662558
SYK		414	502	195	399	377.5		0.0208968	0.172647	0.176677	0.230069	0.21113	0.436228	0.374295	0.640402	0.95405	0.705334
SHPK	452	346	355	414	322	377.8		0.00108723	0.0623994	0.0519668	0.0772842	0.0372842	0.253772	0.136826	0.532697	0.917863	0.478873
KIAA1804	404	338	349	423		378.5		0.00176787	0.083838	0.0670186	0.0941714	0.0377341	0.282224	0.139757	0.566315	0.907472	0.475726
STK36	214	301	496	395	488	378.8		0.0125707	0.132552	0.138366	0.187658	0.175006	0.387105	0.330762	0.595588	0.934807	0.698631
MKNK1	375	331	345		466	379.25		0.00298499	0.0940573	0.0799971	0.11129	0.0588588	0.302476	0.176681	0.571361	0.903611	0.552599
KHK	373	406	398		341	379.5		0.00129433	0.0768249	0.0590049	0.0830962	0.0273566	0.26371	0.115662	0.55343	0.884023	0.452739
PHKG2	414	437	423	427	201	380.4		0.00622831	0.101399	0.100638	0.14092	0.117412	0.330756	0.257514	0.559332	0.903992	0.670619
CAMK2A	312	317	336	469	471	381		0.00307275	0.0797412	0.074216	0.10674	0.0753193	0.286391	0.196799	0.53354	0.882306	0.627362
STK17A	439	438	424	155	455	382.2		0.013732	0.132006	0.13839	0.186235	0.175593	0.37679	0.324032	0.577566	0.897578	0.744876
NTRK3	480	405	397	170	459	382.2		0.0123448	0.126807	0.132099	0.178753	0.166307	0.36877	0.31344	0.573075	0.895316	0.738519
TSSK4		364	369	415		382.667		0.00385496	0.118292	0.0934728	0.122589	0.0451809	0.315731	0.15175	0.591726	0.848557	0.561814
SGK494		378	377	416	362	383.25		0.00103615	0.0684321	0.0508308	0.0713131	0.0204352	0.235537	0.0926369	0.522356	0.810401	0.500955
RPS6KL1	396	335	347	455		383.25		0.00224628	0.0821396	0.067299	0.0936404	0.0435636	0.267873	0.141547	0.537138	0.833438	0.594297
MAP2K5	388	434	420	200	477	383.8		0.00722417	0.102261	0.10259	0.142203	0.12192	0.323489	0.256279	0.541944	0.8639	0.726636
EPHA10	415	471	450	201		384.25		0.0159349	0.14666	0.146951	0.192684	0.169377	0.381642	0.313976	0.588835	0.87528	0.76491
PTK2	187	463	443	374	456	384.6		0.00925769	0.110862	0.113254	0.155081	0.138562	0.336542	0.275612	0.54631	0.860831	0.75139
MYLK2		436	422	364	318	385		0.00213506	0.0788493	0.0641071	0.089068	0.040581	0.256932	0.132808	0.524037	0.804365	0.622173
RIPK4		363	368	345	468	386		0.00214753	0.0777214	0.0631863	0.0876689	0.0401973	0.252428	0.13038	0.517402	0.789129	0.64175
EPHB4	432	425	413	492	170	386.4		0.0115378	0.118068	0.122355	0.165476	0.152639	0.344102	0.289173	0.544372	0.846899	0.785071
DAPK2	424	343	352	339	474	386.4		0.00109325	0.0534791	0.0442544	0.0649703	0.0321296	0.211635	0.111142	0.469186	0.770547	0.641844
PRKACG	466	349	357	474	287	386.6		0.0025425	0.0689381	0.0627785	0.090211	0.0606244	0.249542	0.162942	0.489508	0.79621	0.704045
CDC42BPA	472	350	358	340	413	386.6		0.000902185	0.0504675	0.0407842	0.0600702	0.0272576	0.203041	0.100443	0.463486	0.760565	0.630662
AATK	340	322	501	399	378	388		0.00158376	0.0580908	0.0501801	0.0729108	0.0419685	0.220618	0.128094	0.467216	0.759218	0.697727
PAK7	266	391	385	445	454	388.2		0.00192518	0.0615307	0.0543361	0.0785393	0.0484373	0.22878	0.139564	0.471047	0.763591	0.713531
TLK2	438		478	388	260	391		0.00622584	0.0987504	0.0906491	0.12222	0.0866636	0.286332	0.197143	0.514464	0.764522	0.799967
ROCK2		365	370	346	493	393.5		0.00252388	0.0724057	0.0597962	0.0820043	0.0416649	0.227254	0.121884	0.473144	0.689582	0.792423
IRAK2	461	485	461	378	189	394.8		0.00875529	0.0967139	0.0982194	0.133488	0.118588	0.289022	0.233062	0.483665	0.747197	0.87477
ETNK2	297	451	431	366	433	395.6		0.000984438	0.0441948	0.0359281	0.0521478	0.0253431	0.171078	0.0853494	0.406109	0.628882	0.813085
ANKK1	335	468	448	375	358	396.8		0.000744753	0.039771	0.0311784	0.0453553	0.0195091	0.156726	0.0711616	0.392069	0.597394	0.82539
MAP3K7	394	423	411	471	290	397.8		0.00104282	0.0433611	0.0354796	0.0512892	0.0257205	0.165748	0.0839352	0.394177	0.602552	0.856841
WNK1	260	477	455	417	394	400.6		0.00205183	0.0520649	0.0461581	0.0655612	0.0422174	0.184981	0.112781	0.397071	0.606868	0.921105
NRBP1	383	333	497	396		402.25		0.0021418	0.0606945	0.0489233	0.0665434	0.0322308	0.187847	0.094321	0.417972	0.572278	0.940711
CAMK1D	382	457	437	370	379	405		0.000272368	0.0255641	0.0173681	0.0250822	0.00640565	0.103384	0.0309256	0.323168	0.429776	0.982228
Gapdh	481	356	363		423	405.75		0.00142344	0.0510524	0.0389034	0.0528597	0.0210805	0.160233	0.068851	0.388538	0.505044	1
MAPKAPK5		366	371	447	446	407.5		0.000912648	0.0438295	0.0313436	0.0425217	0.0130878	0.139654	0.0494361	0.369063	0.454235	0.963736
AURKC	412	454	434	368	370	407.6		0.000243161	0.023553	0.0157191	0.0226004	0.00546413	0.0945849	0.0267883	0.30695	0.392004	0.95577
ROR1	469		483	391	306	412.25		0.00254583	0.0558325	0.0459728	0.0617133	0.033347	0.165607	0.0878023	0.371292	0.482462	0.90119
BMPR1B	436	427	415	363	443	416.8		0.000148041	0.0171401	0.0105795	0.0149401	0.00276458	0.0669086	0.0147872	0.252806	0.269635	0.726461
TAF1L	322	488	464	486	335	419		0.0011897	0.0327169	0.0271944	0.0381648	0.0214857	0.114734	0.0600251	0.289453	0.390507	0.796372
TAF1	357	446	429	457	419	421.6		0.000167812	0.016203	0.0101875	0.0142988	0.0030374	0.0616429	0.0146847	0.233878	0.239763	0.639822
TESK1	400		477	387	480	436		0.00052266	0.023847	0.0156283	0.0204042	0.00535099	0.0692757	0.0192786	0.232548	0.197298	0.459385
RPS6KB2	465		481	389	440	443.75		0.000334704	0.018483	0.0112965	0.0145226	0.00297048	0.052165	0.0116357	0.198544	0.13866	0.325448
GRK6			485		472	478.5		0.002737	0.0517175	0.0329428	0.0369989	0.00793134	0.088587	0.0219686	0.253905	0.121981	0.173949
